# Supplementary material
Source: PubMed Central journal article supplement (PMC7870723)
Supplement: NIHMS1616376-supplement-1.pdf [file NIHMS1616376-supplement-1.pdf]

## Supplementary Material

(Supplementary Figures and Tables)

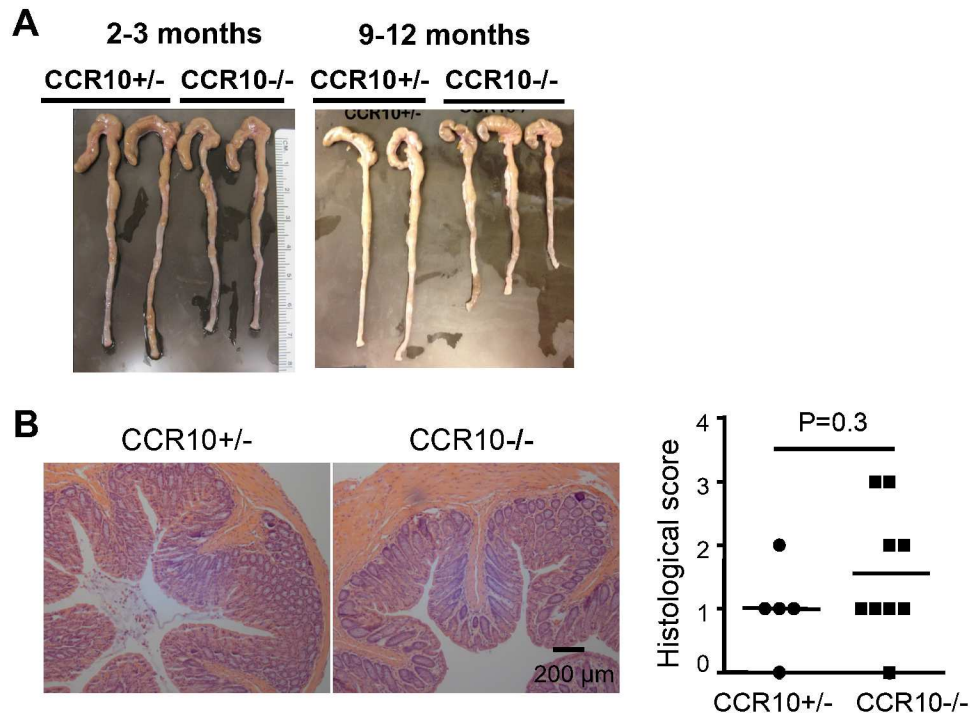

**Supplementary Figure 1.** CCR10<sup>-/-</sup> mice developed colonic inflammation associated with dysregulated T cells. **(A)** Images of colons of CCR10<sup>+/-</sup> and CCR10<sup>-/-</sup> mice at 2-3 and 9-12 months of age. **(B)** Images of H&E-stained colonic sections of CCR10<sup>+/-</sup> and CCR10<sup>-/-</sup> mice at 9-12 months of age and pathological scores of the sections. One dot represents one mouse sample.

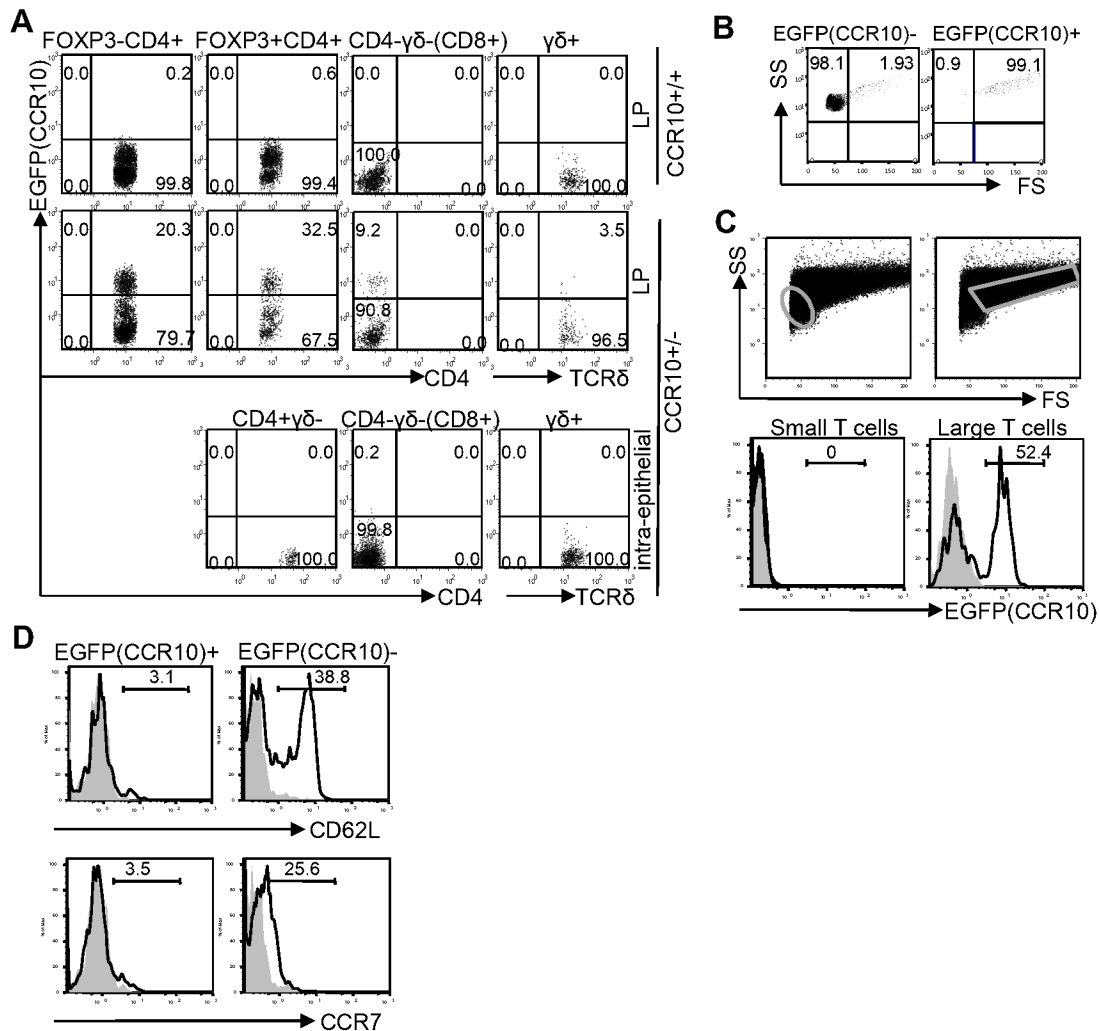

**Supplementary Figure 2.** CCR10<sup>+</sup>IgA<sup>+</sup> cells preferentially conjugate with Treg cells in the colon. **(A)** Flow cytometric analysis of EGFP(CCR10) on gated CD45<sup>+</sup>FOXP3<sup>-</sup>CD4<sup>+</sup>, FOXP3<sup>+</sup>CD4<sup>+</sup>, γδ<sup>-</sup>CD4<sup>-</sup> (mostly CD8<sup>+</sup> αβT) and γδ<sup>+</sup> T cells of the colonic LP, and CD4<sup>+</sup>γδ<sup>-</sup>, CD4<sup>-</sup>γδ<sup>-</sup> and γδ<sup>+</sup> T cells of the colonic epithelium of CCR10<sup>+/-</sup> mice. Representative of at least 5 experiments. Staining results of corresponding wild-type CCR10<sup>+/+</sup> cells are included as negative controls for EGFP. **(B)** Flow cytometric analysis of gated EGFP<sup>-</sup> vs. EGFP<sup>+</sup> colonic LP CD45<sup>+</sup>CD3<sup>+</sup>CD4<sup>+</sup> T cells of CCR10<sup>+/-</sup> mice for their forward-scatter (FS) and side-scatter (SS) profiles. Representative of more than 30 experiments. **(C)** Flow cytometric detection of EGFP(CCR10) on gated small and large colonic CD45<sup>+</sup>CD3<sup>+</sup>CD4<sup>+</sup> T cells of CCR10<sup>+/-</sup> mice. Histograms in the top row show gates of small and large cells based on the FS and SS profiles, from which gated CD3<sup>+</sup>CD4<sup>+</sup> T cells are analyzed for CCR10(EGFP) in the bottom row. Gray areas are staining results of corresponding wild-type T cells as negative controls for EGFP. Representative of more than 30 experiments. **(D)** Flow cytometric detection of CD62L and CCR7 on gated EGFP(CCR10)<sup>+</sup> and EGFP(CCR10)<sup>-</sup> colonic CD45<sup>+</sup>CD3<sup>+</sup> T cells. Gray areas are the staining of isotype control antibodies. Representative of at least 3 experiments.

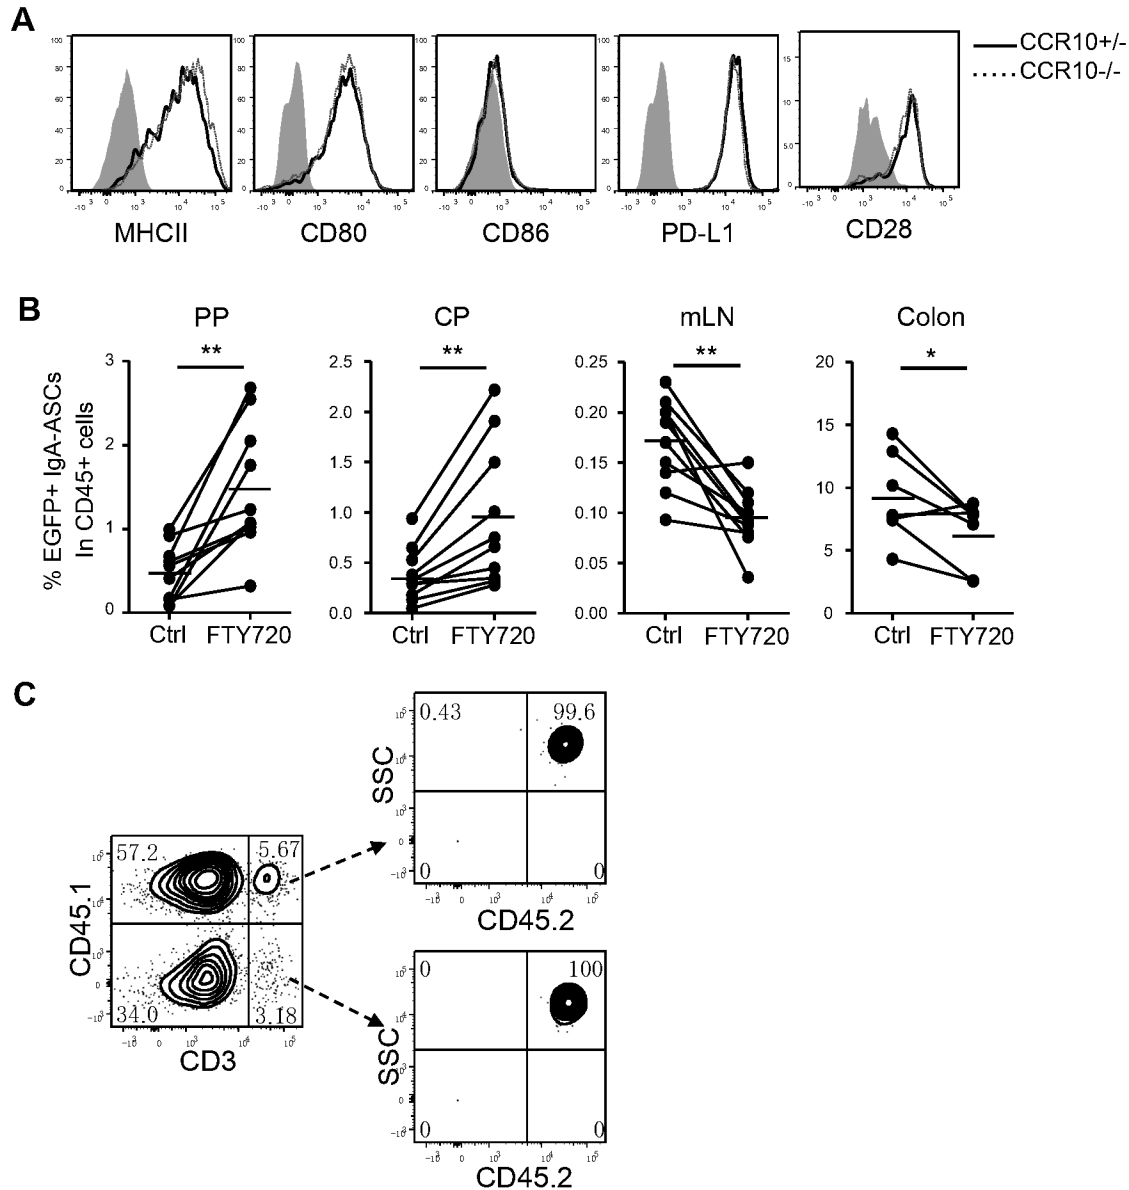

**Supplementary Figure 3.** CCR10 mediates co-migration of IgA-ASCs and conjugating T cells into the colon. **(A)** Representative flow cytometric analysis of gated colonic CD45<sup>+</sup>EGFP<sup>+</sup>intracellular IgA<sup>+</sup> cells of CCR10<sup>+/-</sup> and CCR10<sup>-/-</sup> mice for expression of indicated molecules. The gray graphs are of the staining with isotype control antibodies. **(B)** Comparison of percentages of EGFP(CCR10)<sup>+</sup> IgA-ASCs in the PP, CP, mLN and colons of FTY720-treated (FTY720) and untreated (Ctrl) CCR10<sup>+/-</sup> mice. One dot represents one mouse. Samples analyzed in parallel in the same experiment are linked by a line. **(C)** Representative flow cytometric analysis of EGFP(CCR10)<sup>+</sup> IgA-ASC/T cell conjugates of the PP of  $\mu$ MT<sup>-/-</sup> recipient mouse 2 weeks after receiving co-transfer of CCR10<sup>+/-</sup> (CD45.1/2) and CCR10<sup>-/-</sup> (CD45.2/2) splenic B cells. Gated EGFP(CCR10)<sup>+</sup> cells were first analyzed for CD45.1 and CD3 (Left graph), from which the gated EGFP(CCR10)<sup>+</sup>CD45.1<sup>+</sup>CD3<sup>+</sup> and EGFP(CCR10)<sup>+</sup>CD45.1<sup>-</sup>CD3<sup>+</sup> populations were analyzed for the CD45.2 expression. Representative of 8 mice analyzed.

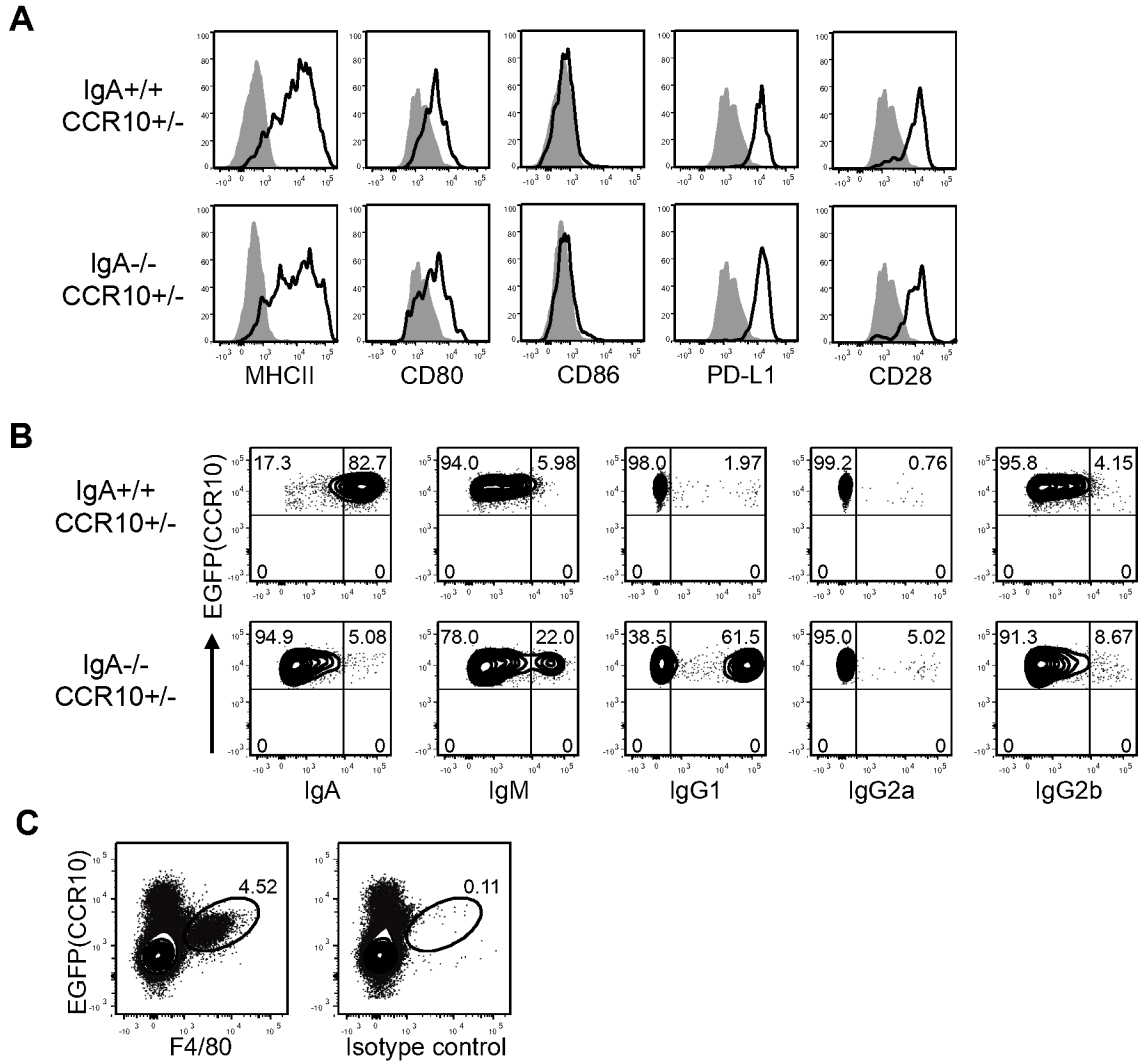

**Supplementary Figure 4.** CCR10<sup>+</sup> IgG1-ASCs are the major isotype of ASCs that substitute for CCR10<sup>+</sup> IgA-ASCs in the colons of IgA-knockout mice. **(A)** Flow cytometric analysis of gated CD45<sup>+</sup>EGFP(CCR10)<sup>+</sup> colonic plasma cells of IgA<sup>+/+</sup> CCR10<sup>+/-</sup> and IgA<sup>-/-</sup> CCR10<sup>+/-</sup> mice for expression of indicated molecular markers. Gray areas are of the staining of isotype control antibodies. **(B)** Representative flow cytometric analysis of gated CD45<sup>+</sup>EGFP(CCR10)<sup>+</sup> colonic plasma cells of IgA<sup>+/+</sup> CCR10<sup>+/-</sup> and IgA<sup>-/-</sup> CCR10<sup>+/-</sup> mice for intracellular expression of different antibody isotypes. **(C)** Gating strategy to identify colonic CD45<sup>+</sup>F4/80<sup>+</sup> macrophages of IgA<sup>-/-</sup> CCR10<sup>+/-</sup> mice.

**Supplementary Table 1. Clinical Information of Patients with Selective IgA Deficiency\***

| Patient        | Gender | Age | Ethnicity        | Indication for Biopsy  | Pathology Diagnosis |
|----------------|--------|-----|------------------|------------------------|---------------------|
| 1              | F      | 60  | Hispanic         | Colon cancer screening | Tubular adenoma     |
| 2              | F      | 75  | African American | Colon cancer screening | Tubular adenoma     |
| 3              | M      | 51  | Hispanic         | Colon cancer screening | Tubular adenoma     |
| 4 <sup>#</sup> | F      | 65  | Hispanic         | Colon cancer screening | Tubular adenoma     |
| 5              | F      | 81  | African American | Colon cancer screening | Normal              |
| 6              | F      | 43  | Hispanic         | Colon cancer screening | Tubular adenoma     |
| 7              | F      | 49  | African American | Colon cancer screening | Juvenile polyp      |
| 8              | M      | 36  | White            | Heme positive stool    | Lymphoid aggregates |
| 9              | F      | 57  | White            | Anemia, diarrhea       | Tubular adenoma     |
| 10             | F      | 60  | African American | Anemia                 | Lymphoid aggregates |
| 11             | F      | 70  | African American | Colon cancer screening | Lymphoid aggregates |

Note: \*The composition of plasma cells was evaluated on portions of specimen with normal colonic mucosa other than tubular adenoma, juvenile polyp or lymphoid aggregates. <sup>#</sup>This patient has 4 specimens from different colonic segments.

**Supplementary Table 2. A list of antibodies used**

| <b>Name of Antibody (species of origin)</b>            | <b>Clone #</b> | <b>Company</b>                 |
|--------------------------------------------------------|----------------|--------------------------------|
| anti-mouse CD62L (Rat / IgG2a, kappa)                  | MEL-14         | eBioscience<br>(San Diego, CA) |
| anti-mouse CD4 (Rat / IgG2b, kappa)                    | GK1.5          |                                |
| anti-mouse CD8 $\alpha$ (Rat / IgG2a, kappa)           | 53-6.7         |                                |
| anti-mouse TCR $\gamma\delta$ (Armenian hamster / IgG) | GL3            |                                |
| anti-mouse/rat Foxp3 (Rat / IgG2a, kappa)              | FJK-16s        |                                |
| anti-mouse IgA (Rat / IgG1, kappa)                     | 11-44-2        |                                |
| anti-mouse TCR $\beta$ (Armenian hamster / IgG)        | H57-597        |                                |
| anti-mouse MHCII (Rat / IgG2b, kappa)                  | M5/114.15.2    |                                |
| anti-mouse CD28 (Syrian hamster / IgG)                 | 37.51          |                                |
| anti-mouse PD-L1 (Rat / IgG2a, lambda)                 | MIH5           |                                |
| anti-mouse IL-17A (Rat / IgG1, kappa)                  | TC11-18H10.1   | Biolegend<br>(San Diego, CA)   |
| anti-mouse CD45 (Rat / IgG2b, kappa)                   | 30-F11         |                                |
| anti-mouse CD45.1 (Mouse / IgG2a, kappa)               | A20            |                                |
| anti-mouse CD45.2 (Mouse / IgG2a, kappa)               | 104            |                                |
| anti-mouse CD3 (Rat / IgG2b, kappa)                    | 17A2           |                                |
| anti-mouse CCR7 (Rat / IgG2a, kappa)                   | 4B12           |                                |
| anti-mouse IgG1 (Rat / IgG)                            | RMG1-1         |                                |
| anti-mouse IgG2a (Rat)                                 | RMG2a-62       |                                |
| anti-mouse F4/80 (Rat / IgG2a, kappa)                  | BM8            |                                |
| anti-mouse CD80 (Armenian hamster / IgG)               | 16-10A1        |                                |

|                                                                          |             |                                  |
|--------------------------------------------------------------------------|-------------|----------------------------------|
| anti-mouse CD86 (Rat / IgG2a, kappa)                                     | GL-1        |                                  |
| anti-mouse IL-10 (Rat / IgG2b, kappa)                                    | JES5-16E3   | BD Biosciences<br>(San Jose, CA) |
| anti-mouse IFN $\gamma$ (Rat / IgG1, kappa)                              | XMG1.2      |                                  |
| anti-mouse CD3 $\epsilon$ (Armenian hamster / IgG)                       | 145-2C11    |                                  |
| anti-mouse IgA (Rat)                                                     | C10-1       |                                  |
| anti-mouse $\alpha 4\beta 7$ (Rat)                                       | DATK32      |                                  |
| anti-mouse IgG2b (Rat)                                                   | R12-3       |                                  |
| anti-mouse IgM (Rat / IgG1, kappa)                                       | 1B4B1       | Southern Biotech                 |
| anti-human CCR10 (polyclonal) (Goat)                                     | SKU: CI0126 | Capralogics                      |
| anti-human IgA (polyclonal) (Rabbit)                                     | A0262       | Dako                             |
| anti-human IgG (polyclonal) (Rabbit)                                     | A0424       |                                  |
| anti-human IgM (polyclonal) (Rabbit)                                     | A0426       |                                  |
| EnVision+ System-HRP labeled polymer anti-rabbit antibodies (polyclonal) | N/A         |                                  |
| peroxidase affiniPure<br>rabbit anti-goat IgG (H+L) (polyclonal)         | N/A         | Jackson<br>ImmunoResearch        |
| anti-human IgG2 (Rabbit)                                                 | EPR4418     | Abcam                            |
| anti-human IgG1 (Rabbit)                                                 | RM117       | RevMAb<br>Biosciences            |
| anti-human IgG3 (Rabbit)                                                 | RM119       |                                  |
| anti-human IgG4 (Rabbit)                                                 | RM120       |                                  |

Note: all antibodies are monoclonal unless indicated otherwise.

**Supplementary Table 3. A list of chemicals used**

| Name of Chemical                                      | Company                                   |
|-------------------------------------------------------|-------------------------------------------|
| FOXP3/transcription factor staining buffer set        | eBioscience (San Diego, CA)               |
| collagenase type I                                    | Worthington Biochemical<br>(Lakewood, NJ) |
| collagenase type IV                                   |                                           |
| hyaluronidase                                         | Sigma (St. Louis, MO)                     |
| dextran sulfate sodium salt (DSS, M.W. 36,000-50,000) | MP Biomedicals (Solon, OH)                |
| FTY720                                                | Cayman Chemical                           |



**Supplementary Table 4. Sequences of primers used in real-time PCR**

| Name of Gene   | Sequence of Primer                |
|----------------|-----------------------------------|
| IL-1 $\alpha$  | Forward: GAAGAAGAGACGGCTGAG       |
|                | Reverse: GTAGGTGTAAGGTGCTGAT      |
| IL-17A         | Forward: CAGCAGCGATCATCCCTCAAAG   |
|                | Reverse: CAGGACCAGGATCTCTTGCTG    |
| TNF- $\alpha$  | Forward: TTCTATGGCCCAGACCC        |
|                | Reverse: GGCACCACTAGTTGGTTGTC     |
| IL-22          | Forward: CGTCAACCGCACCTTTAT       |
|                | Reverse: AGGGCTGGAACCTGTCTG       |
| IFN $\gamma$   | Forward: AGGAACTGGCAAAGGATGGTG    |
|                | Reverse: GTGCTGGCAGAATTATTCTTATTG |
| $\beta$ -actin | Forward: CCCATCTACGAGGGCTAT       |
|                | Reverse: TGTCA-CGCACGATTTC        |
